# Supplementary material
Source: publisher site journal article supplement (https://www.dovepress.com/article/297555)
Supplement: Supplementary file 1 [file get_supplementary_file.php]

**Supplementary Table 1** Fifty vascular tumor patients enrolled in the study

| Study ID | Age of diagnosis (years) | Diagnosis | Size (cm) | Location | Specific location | Visceral involvement | Biopsy | Imaging | Treatment | Complication | Outcome |
| --- | --- | --- | --- | --- | --- | --- | --- | --- | --- | --- | --- |
| 001 | 14.00 | Hemangioma | 1.2 | Head and neck | Scalp | No | Yes | - | Surgery | No | Alive without disease |
| 002 | 7.00 | Hemangioma | 0.3 | Head and neck | Eyelid | No | Yes | - | Surgery | No | Alive without disease |
| 003 | 8.50 | Hemangioma | 3.5 | Head and neck | Neck | No | Yes | Ultrasound | Surgery | No | Alive without disease |
| 004 | 4.58 | Hemangioma | 3 | Extremity | Elbow | No | Yes | MRI | Surgery | No | Alive without disease |
| 005 | 16.58 | Hemangioma | 0.5 | Extremity | Shoulder | No | Yes | - | Surgery | No | Alive without disease |
| 006 | 14.00 | Hemangioma | N/A | Head and neck | Scalp | No | Yes | - | Observation | No | Alive without disease |
| 007 | 5.25 | Infantile hepatic hemangioma* | 8 | Liver | Liver | Yes | Yes | Ultrasound and CT scan | Surgery | No | Alive without disease |
| 008 | 12.42 | Hemangioma | 0.8 | Extremity | Elbow | No | Yes | - | Surgery | No | Deceased without disease |
| 009 | 15.08 | Hemangioma | 0.8 | Head and neck | Nasal | No | Yes | - | Surgery | Bleeding | Alive without disease |
| 010 | 14.83 | Hemangioma | 1.3 | Trunk | Abdomen | No | Yes | Ultrasound | Surgery | No | Alive without disease |
| 011 | 12.58 | Hemangioma | 1.5 | Head and neck | Nose | No | Yes | - | Surgery | No | Alive without disease |
| 012 | 10.92 | Hemangioma | 2 | Head and neck | Nose | No | Yes | - | Surgery | No | Alive without disease |
| 013 | 13.67 | Hemangioma | 2.45 | Extremity | Leg intramuscular | No | Yes | MRI | Surgery | No | Alive without disease |
| 014 | 2.00 | Hemangioma | 5 | Extremity | Scapula | No | Yes | Ultrasound | Surgery | No | Alive without disease |
| 015 | 13.67 | Hemangioma | 1.4 | Head and neck | Lip | No | Yes | - | Surgery | Bleeding | Alive without disease |
| 016 | 17.17 | Hemangioma | 0.7 | Head and neck | Eyelid | No | Yes | - | Surgery | No | Alive without disease |
| 017 | 13.50 | Hemangioma | 2 | Head and neck | Oral cavity | No | Yes | - | Surgery | Bleeding | Alive without disease |
| 018 | 9.00 | Hemangioma | 0.6 | Trunk | Supraclavicular | No | Yes | -- | Surgery | No | Alive without disease |
| 019 | 18.25 | Hemangioma | 8.5 | Extremity | Wrist | No | Yes | MRI | Surgery | No | Alive with disease |
| 020 | 10.50 | Hemangioma | 11 | Extremity | Leg intramuscular | No | Yes | MRI | Surgery | No | Alive without disease |
| 021 | 13.33 | Hemangioma | 10 | Extremity | Leg, foot | No | Yes | MRI | Surgery | No | Alive with disease |
| 022 | 17.25 | Hemangioma | 0.6 | Extremity | Leg | No | Yes | - | Surgery | No | Alive without disease |
| 023 | 0.67 | Hemangioma | 5 | Head and neck | Neck | No | Yes | - | Surgery | No | Alive without disease |
| 024 | 13.50 | Hemangioma | 4.5 | Extremity | Leg, foot | No | Yes | Bone scan , plain film | Surgery | No | Alive without disease |
| 025 | 5.92 | Hemangioma | 3 | Head and neck | Ear | No | Yes | Ultrasound | Surgery | No | Alive without disease |
| 026 | 12.92 | Hemangioma | 0.5 | Extremity | Finger | No | Yes | - | Surgery | No | Alive without disease |
| 027 | 12.50 | Hemangioma | 8 | Extremity | Elbow | No | Yes | Ultrasound and plain film | Surgery | No | Alive without disease |
| 028 | 13.08 | Hemangioma | 1.1 | Extremity | Hand | No | Yes | - | Surgery | No | Alive without disease |
| 029 | 10.33 | Hemangioma | 0.3 | Head and neck | Nose | No | Yes | - | Surgery | No | Alive without disease |
| 030 | 9.25 | Hemangioma | 0.7 | Trunk | Abdominal wall | No | Yes | - | Surgery | No | Alive without disease |
| 031 | 9.42 | Hemangioma | 1.5 | Head and neck | Tongue | No | Yes | - | Surgery | Bleeding | Alive with disease |
| 032 | 7.58 | Hemangioma | 0.8 | Head and neck | Scalp | No | Yes | - | Surgery | No | Alive without disease |
| 033 | 13.75 | Hemangioma | 1.5 | Head and neck | Lip | No | Yes | - | Surgery | Bleeding | Alive without disease |
| 034 | 18.58 | Hemangioma | 1 | Head and neck | Scalp | No | Yes | - | Surgery | No | Alive without disease |
| 035 | 17.58 | Hemangioma | 1 | Extremity | Shoulder | No | Yes | - | Surgery | No | Alive without disease |
| 036 | 8.33 | Hemangioma | 10 | Extremity | Scapula | No | Yes | - | Surgery | No | Alive without disease |
| 037 | 15.33 | Hemangioma | 4 | Intracranial | Temporal lobe | Yes | Yes | MRI | Surgery | Seizure | Alive without disease |
| 038 | 9.50 | Hemangioma | 0.5 | Extremity | Hand | No | Yes | - | Surgery | No | Alive without disease |
| 039 | 1.25 | Hemangioma | 2.5 | Head and neck | Orbit | Yes | Yes | CT scan | Surgery | Proptosis | Alive without disease |
| 040 | 0.02 | Hemangioma | 1 | Extremity | Foot | No | Yes | Ultrasound | Surgery | No | Alive without disease |
| 041 | 0.42 | Hemangioma | 9 | Head and neck | Face | No | No | Ultrasound | Medication | No | Alive with disease |
| 042 | 15.42 | Juvenile nasal angiofibroma | 4.6 | Head and neck | Nose | No | Yes | MRI | Surgery | Bleeding | Alive without disease |
| 043 | 0.00 | KHE with KMP | 6.5 | Extremity | Leg | No | No | Ultrasound and MRI | Medication | Bleeding | Alive without disease |
| 044 | 10.00 | Hemangioma | 16 | Extremity | Leg intramuscular | No | No | MRI | Observation | No | Alive with disease |
| 045 | 0.50 | Infantile hepatic hemangioma* | 7.8 | Liver | Liver multiple | Yes | No | Ultrasound and MRI | Observation | Poor weight gain | Alive with disease |
| 046 | 0.25 | KHE with KMP | 15 | Retroperito- neum | Retroperitoneum | Yes | No | Ultrasound, CT scan, MRI and Tc-99m RBCs scan | Medication | Bleeding, feeding intolerance | Alive without disease |
| 047 | 14 | Pyogenic granuloma | 0.5 | Head and neck | Scalp | No | Yes | - | Surgery | No | Alive without disease |
| 048 | 12 | Pyogenic granuloma | N/A | Head and neck | Cheek | No | Yes | - | Surgery | No | Alive without disease |
| 049 | 11 | Pyogenic granuloma | 0.5 | Head and neck | Scalp | No | Yes | - | Surgery | No | Alive without disease |
| 050 | 11 | Pyogenic granuloma | N/A | Head and neck | Scalp | No | Yes | - | Surgery | No | Alive without disease |

**Abbreviations:** KHE, Kapasiform hemangioendothelioma; KMP, Kasabach-Meritt Phenomenon, MRI, magnetic resonance imaging; CT, computed tomography; RBCs, red blood cells; N/A, not available

*Infantile hepatic hemangioma means liver hemangioendothelioma

**Supplementary Table 2** Characteristics of two cases of kapasiform hemangioendothelioma (KHE) with Kasabach-Merritt phenomenon (KMP)

| Age at diagnosis (months) | Size (cm) | Location | Initial platelet count (cell/mm3) | Lowest platelet count (cell/mm3) | Time to platelet recovery >150,000/mm3 (days) | Initial fibrinogen (mg/dl) | Lowest fibrinogen (mg/dl) | Time to fibrinogen >200 mg/dl (days) | Time to complete remission (months) | Last status |
| --- | --- | --- | --- | --- | --- | --- | --- | --- | --- | --- |
| Birth | 6.5 | Leg | 18,000 | 5,000 | 112 | 72.5 | <50 | 240 | 8 | Alive, no evidence of disease |
| 3 | 15 | Retroperito- neum | 22,000 | 7,000 | 119 | 0 | 0 | 70 | 6 | Alive, no evidence of disease |
